# Supplementary material for: The mitochondrial hinge protein, UQCRH, is a novel prognostic factor for hepatocellular carcinoma
Source: PubMed Central journal article supplement (PMC5387164; doi:10.1002/cam4.1042), 2017-03-23
Supplement: CAM4-6-749-s002.pdf [file CAM4-6-749-s002.pdf]

**Supplementary Table 1. Identification of clinical parameters effective for survival discrimination based on UQCRH expression**

| Variables         | Classification | <i>P-value*</i>    |                          |
|-------------------|----------------|--------------------|--------------------------|
|                   |                | Overall survival   | Recurrence-free survival |
| AFP               | <20            | 0.539              | 0.754                    |
|                   | ≥20            | <b>&lt;0.001**</b> | <b>0.001</b>             |
| Tumor grade       | I,             | 0.840              | 0.388                    |
|                   | II, III        | <b>0.008</b>       | <b>0.010</b>             |
| Tumor size (cm)   | <3             | 0.961              | 0.468                    |
|                   | ≥3             | <b>0.010</b>       | 0.136                    |
| Vascular invasion | no             | <b>0.031</b>       | 0.116                    |
|                   | yes            | 0.106              | 0.200                    |
| Cirrhosis         | no             | 0.155              | 0.436                    |
|                   | yes            | 0.052              | 0.050                    |

\*Significance determined by log-rank test.

\*\* Bold indicates  $p < 0.05$ .

**Supplementary Table 2. Effect of AFP levels in survival discrimination based on UQCRH expression**

| AFP  | Distribution | <i>P-value*</i>    |                          |
|------|--------------|--------------------|--------------------------|
|      |              | Overall survival   | Recurrence-free survival |
| <20  | 42           | 0.539              | 0.754                    |
| ≥20  | 54           | <b>&lt;0.001**</b> | <b>0.001</b>             |
| <50  | 50           | 0.562              | 0.641                    |
| ≥50  | 46           | <b>&lt;0.001</b>   | <b>&lt;0.001</b>         |
| <100 | 60           | 0.296              | 0.994                    |
| ≥100 | 36           | <b>&lt;0.001</b>   | <b>&lt;0.001</b>         |
| <200 | 64           | 0.122              | 0.745                    |
| ≥200 | 32           | <b>0.001</b>       | <b>&lt;0.001</b>         |
| <400 | 68           | <b>0.041</b>       | 0.413                    |
| ≥400 | 28           | <b>0.007</b>       | <b>0.002</b>             |

\*Significance determined by log-rank test.

\*\* Bold indicates  $p < 0.05$ .

**Supplementary Table 3. Univariate analysis of UQCRH expression and clinicopathological parameters (n=96)**

| Factor***                                  | Overall survival |               |                   | Recurrence-free survival |               |              |
|--------------------------------------------|------------------|---------------|-------------------|--------------------------|---------------|--------------|
|                                            | HR**             | 95% CI***     | P-value*          | HR**                     | 95% CI**      | P-value*     |
| Gender (F vs M)                            | 0.641            | 0.301 ~ 1.365 | 0.249             | 0.569                    | 0.299 ~ 1.082 | 0.086        |
| Age ( $\geq 52$ vs $< 52$ )                | 1.084            | 0.622 ~ 1.886 | 0.777             | 1.277                    | 0.801 ~ 2.036 | 0.304        |
| AFP ( $\geq 20$ vs $< 20$ )                | 1.890            | 1.051 ~ 3.399 | <b>0.033</b> **** | 1.273                    | 0.798 ~ 2.030 | 0.311        |
| AST ( $\geq 40$ vs $< 40$ )                | 1.673            | 0.941 ~ 2.974 | 0.080             | 1.186                    | 0.747 ~ 1.884 | 0.469        |
| ALT ( $\geq 35$ vs $< 35$ )                | 0.961            | 0.537 ~ 1.720 | 0.893             | 0.825                    | 0.512 ~ 1.329 | 0.429        |
| Child_P classification (B or C vs A)       | 2.211            | 0.989 ~ 4.945 | 0.053             | 1.607                    | 0.732 ~ 3.528 | 0.237        |
| Tumor size ( $\geq 3$ vs $< 3$ )           | 1.854            | 0.736 ~ 4.670 | 0.190             | 2.360                    | 1.081 ~ 5.156 | <b>0.031</b> |
| Tumor number (multiple vs solitary)        | 1.072            | 0.480 ~ 2.391 | 0.866             | 1.262                    | 0.661 ~ 2.413 | 0.481        |
| Tumor grade (II or III vs I)               | 2.962            | 0.922 ~ 9.517 | 0.068             | 0.798                    | 0.419 ~ 1.522 | 0.494        |
| TNM stage (III or IV vs I or II)           | 2.288            | 1.256 ~ 4.167 | <b>0.007</b>      | 1.811                    | 1.069 ~ 3.065 | <b>0.027</b> |
| Macroscopic vascular invasion (yes vs no)  | 3.859            | 1.887 ~ 7.888 | <b>&lt;0.001</b>  | 2.967                    | 1.535 ~ 5.734 | <b>0.001</b> |
| Microscopic vascular invasion (yes vs no)  | 1.989            | 1.112 ~ 3.556 | <b>0.020</b>      | 1.380                    | 0.826 ~ 2.306 | 0.218        |
| Capsule invasion (yes vs no)               | 2.504            | 1.416 ~ 4.427 | <b>0.002</b>      | 1.656                    | 1.041 ~ 2.634 | <b>0.033</b> |
| Cirrhosis (yes vs no)                      | 1.570            | 0.896 ~ 2.752 | 0.115             | 1.363                    | 0.842 ~ 2.208 | 0.208        |
| UQCRH expression ( $\geq 2.1$ vs $< 2.1$ ) | 2.189            | 1.25 ~ 3.834  | <b>0.006</b>      | 1.673                    | 1.054 ~ 2.655 | <b>0.029</b> |

\*Significance determined by Univariate Cox regression analysis

\*\*HR, hazard ratio; \*\*\*CI, confidence interval; \*\*\*\* Bold indicates  $p < 0.05$ .

**Supplementary Table 4. Univariate analysis of UQCRH expression and clinicopathological parameters in patient subgroup (AFP $\geq$ 20, n=54)**

| Variables                                 | Overall survival |                |                  | Recurrence-free survival |                |                   |
|-------------------------------------------|------------------|----------------|------------------|--------------------------|----------------|-------------------|
|                                           | HR**             | 95% CI***      | P-value*         | HR**                     | 95% CI***      | P-value*          |
| Gender (F vs M)                           | 0.475            | 0.196 ~ 1.1547 | 0.100            | 1.491                    | 0.792 ~ 2.807  | 0.216             |
| Age ( $\geq$ 52 vs <52)                   | 1.307            | 0.655 ~ 2.609  | 0.448            | 0.550                    | 0.253 ~ 1.195  | 0.131             |
| AST ( $\geq$ 40 vs <40)                   | 1.201            | 0.558 ~ 2.585  | 0.640            | 1.265                    | 0.630 ~ 2.541  | 0.508             |
| ALT ( $\geq$ 35 vs <35)                   | 0.667            | 0.323 ~ 1.378  | 0.274            | 0.693                    | 0.357 ~ 1.345  | 0.278             |
| Child_P classification (B or C vs A)      | 2.236            | 0.908 ~ 5.505  | 0.080            | 1.690                    | 0.700 ~ 4.084  | 0.244             |
| Tumor size ( $\geq$ 3 vs <3)              | 2.066            | 0.629 ~ 6.781  | 0.232            | 3.326                    | 1.021 ~ 10.837 | <b>0.046</b> **** |
| Tumor number (multiple vs solitary)       | 0.427            | 0.102 ~ 1.794  | 0.245            | 0.865                    | 0.306 ~ 2.447  | 0.785             |
| Tumor grade (II or III vs I)              | 3.364            | 0.459 ~ 24.636 | 0.233            | 0.462                    | 0.163 ~ 1.304  | <b>0.145</b>      |
| TNM stage (III or IV vs I or II)          | 1.405            | 0.651 ~ 3.032  | 0.387            | 1.554                    | 0.768 ~ 3.144  | 0.220             |
| Macroscopic vascular invasion (yes vs no) | 5.135            | 2.141 ~ 12.315 | <b>&lt;0.001</b> | 3.614                    | 1.554 ~ 8.404  | <b>0.003</b>      |
| Microscopic vascular invasion (yes vs no) | 1.753            | 0.832 ~ 3.693  | 0.140            | 1.443                    | 0.723 ~ 2.878  | 0.298             |
| Capsule invasion (yes vs no)              | 2.471            | 1.199 ~ 5.091  | <b>0.014</b>     | 2.048                    | 1.076 ~ 3.898  | <b>0.029</b>      |
| Cirrhosis (yes vs no)                     | 0.854            | 0.402 ~ 1.815  | 0.682            | 0.947                    | 0.484 ~ 1.852  | 0.873             |
| UQCRH expression ( $\geq$ 2.1 vs <2.1)    | 3.419            | 1.659 ~ 7.046  | <b>0.001</b>     | 2.801                    | 1.462 ~ 5.367  | <b>0.002</b>      |

\*Significance determined by Univariate Cox regression analysis

\*\*HR, hazard ratio; \*\*\*CI, confidence interval; \*\*\*\* Bold indicates  $p < 0.05$ .
